# Supplementary material for: Fluorescence Spectroscopic Analysis of ppGpp Binding to cAMP Receptor Protein and Histone-Like Nucleoid Structuring Protein
Source: Int J Mol Sci. 2021 Jul 23;22(15):7871. doi: 10.3390/ijms22157871 (PMC8346002; doi:10.3390/ijms22157871)
Supplement: Supplementary file 1 [file ijms-22-07871-s001.zip › ijms-1265761-supplementary.pdf]

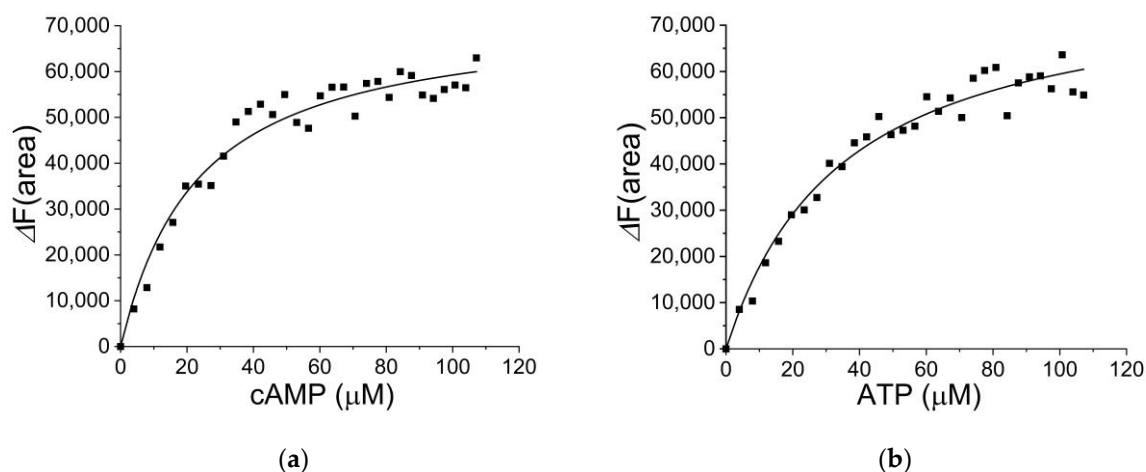

**Supplementary Figure S1.** Determination of the dissociation constant  $K_D$ 's for cAMP and ATP to CRP by fluorescence spectroscopy. (a) The fluorescence change ( $\Delta F(\text{area})$ ) between 334 and 348 nm against cAMP concentrations. The emission spectra of CRP (2  $\mu\text{M}$ ) were recorded at 25  $^{\circ}\text{C}$ . The  $K_D$  values for cAMP-binding to CRP was calculated as  $22 \pm 3 \mu\text{M}$ . (b) The fluorescence change ( $\Delta F(\text{area})$ ) between 334 and 348 nm against ATP concentrations. The  $K_D$  values for ATP-binding to CRP was  $33 \pm 4 \mu\text{M}$ .

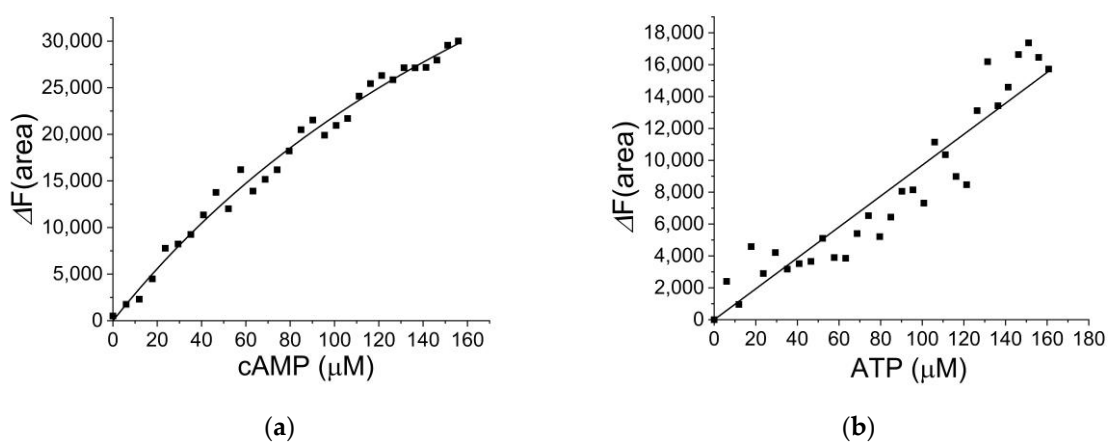

**Supplementary Figure S2.** The dissociation constant  $K_D$ 's for cAMP and ATP to H-NS determined by fluorescence spectroscopy. (a) The fluorescence change ( $\Delta F(\text{area})$ ) between 322 and 336 nm against cAMP concentrations. The emission spectra of N-NS (10  $\mu\text{M}$ ) were recorded at 25  $^{\circ}\text{C}$ . The  $K_D$  values for cAMP-binding to H-NS was calculated as  $270 \pm 40 \mu\text{M}$ . (b) The fluorescence change ( $\Delta F(\text{area})$ ) between 322 and 336 nm against ATP concentrations. ATP-binding does not show a saturation curve, suggesting a high  $K_D$  value.
